# Supplementary material for: The Effect of Chitosan Incorporation on Physico-Mechanical and Biological Characteristics of a Calcium Silicate Filling Material
Source: MDPI journal article supplement (doi:10.3390/dj12040100), 2024-04-10
Supplement: s1 [file s1]

**Supplementary Table S1. Chitosan percentages (%) incorporated into Biodentine material.**

| Test group      | BD-P (g) | CS-P (g) | BD-L (μL) |
|-----------------|----------|----------|-----------|
| BD Control      | 0.7      | —        | 180       |
| BD + 2.5 wt% CS | 0.6825   | 0.0175   | 180       |
| BD + 5 wt% CS   | 0.665    | 0.035    | 200       |
| BD + 10 wt% CS  | 0.63     | 0.07     | 270       |
| BD + 20 wt% CS  | 0.56     | 0.14     | 400       |

To assure consistency between samples, the dry powder of Biodentine was reweighed, before mixing, to exact 0.7 g as weight variations between Biodentine capsules were observed. The manufacturer liquid was measured and dispensed in microlitres. Biodentine powder weighing 0.7 g (BD-P) was mixed with 180 μL of the manufacturer Biodentine liquid (BD-L [5 drops of Biodentine liquid = 180 μL]). Incorporating higher concentrations of chitosan (> 2.5 wt%) required higher volumes of BD liquid to triturate the new composite.
